# Supplementary material
Source: Springer Nature journal article supplement (https://www.springermedizin.de/resource/supplementary/13584_2012_27_MOESM1_ESM.pdf/9676826)
Supplement: MOESM1 [file 9676826]

# Physician / Patient Communication in the “e-Health” Context

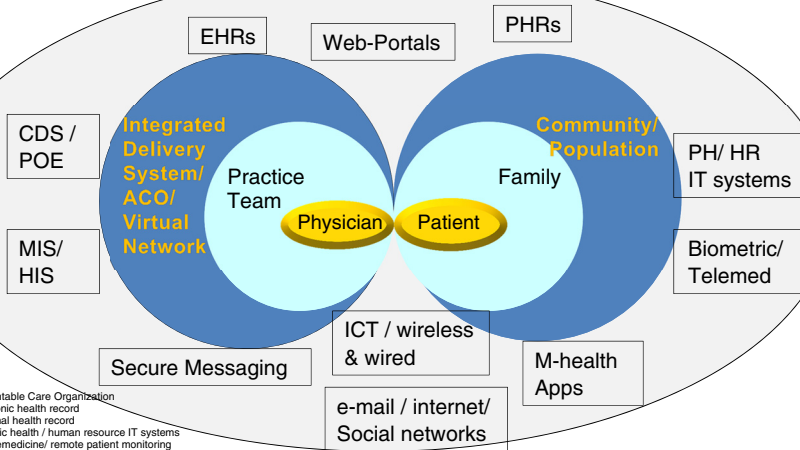

ACO= Accountable Care Organization  
 EHR = electronic health record  
 PHR = personal health record  
 PH/HR = public health / human resource IT systems  
 Telemed= telemedicine/ remote patient monitoring  
 M-health = mobile health applications  
 ICT = information / communication technology  
 CDS = clinical decision support IT systems  
 MIS/HIS = Management/Health IT systems  
 POE = provider order entry IT systems

The core physician/patient components of this slide were adapted from an American College of Physicians graphic summarizing a framework developed by the IOM "Defining Primary Care" 1994 report. (See ref 17)
